# Supplementary material
Source: Springer Nature journal article supplement (https://www.springermedizin.de/resource/supplementary/12889_2007_1323_MOESM5_ESM.pdf/9502966)

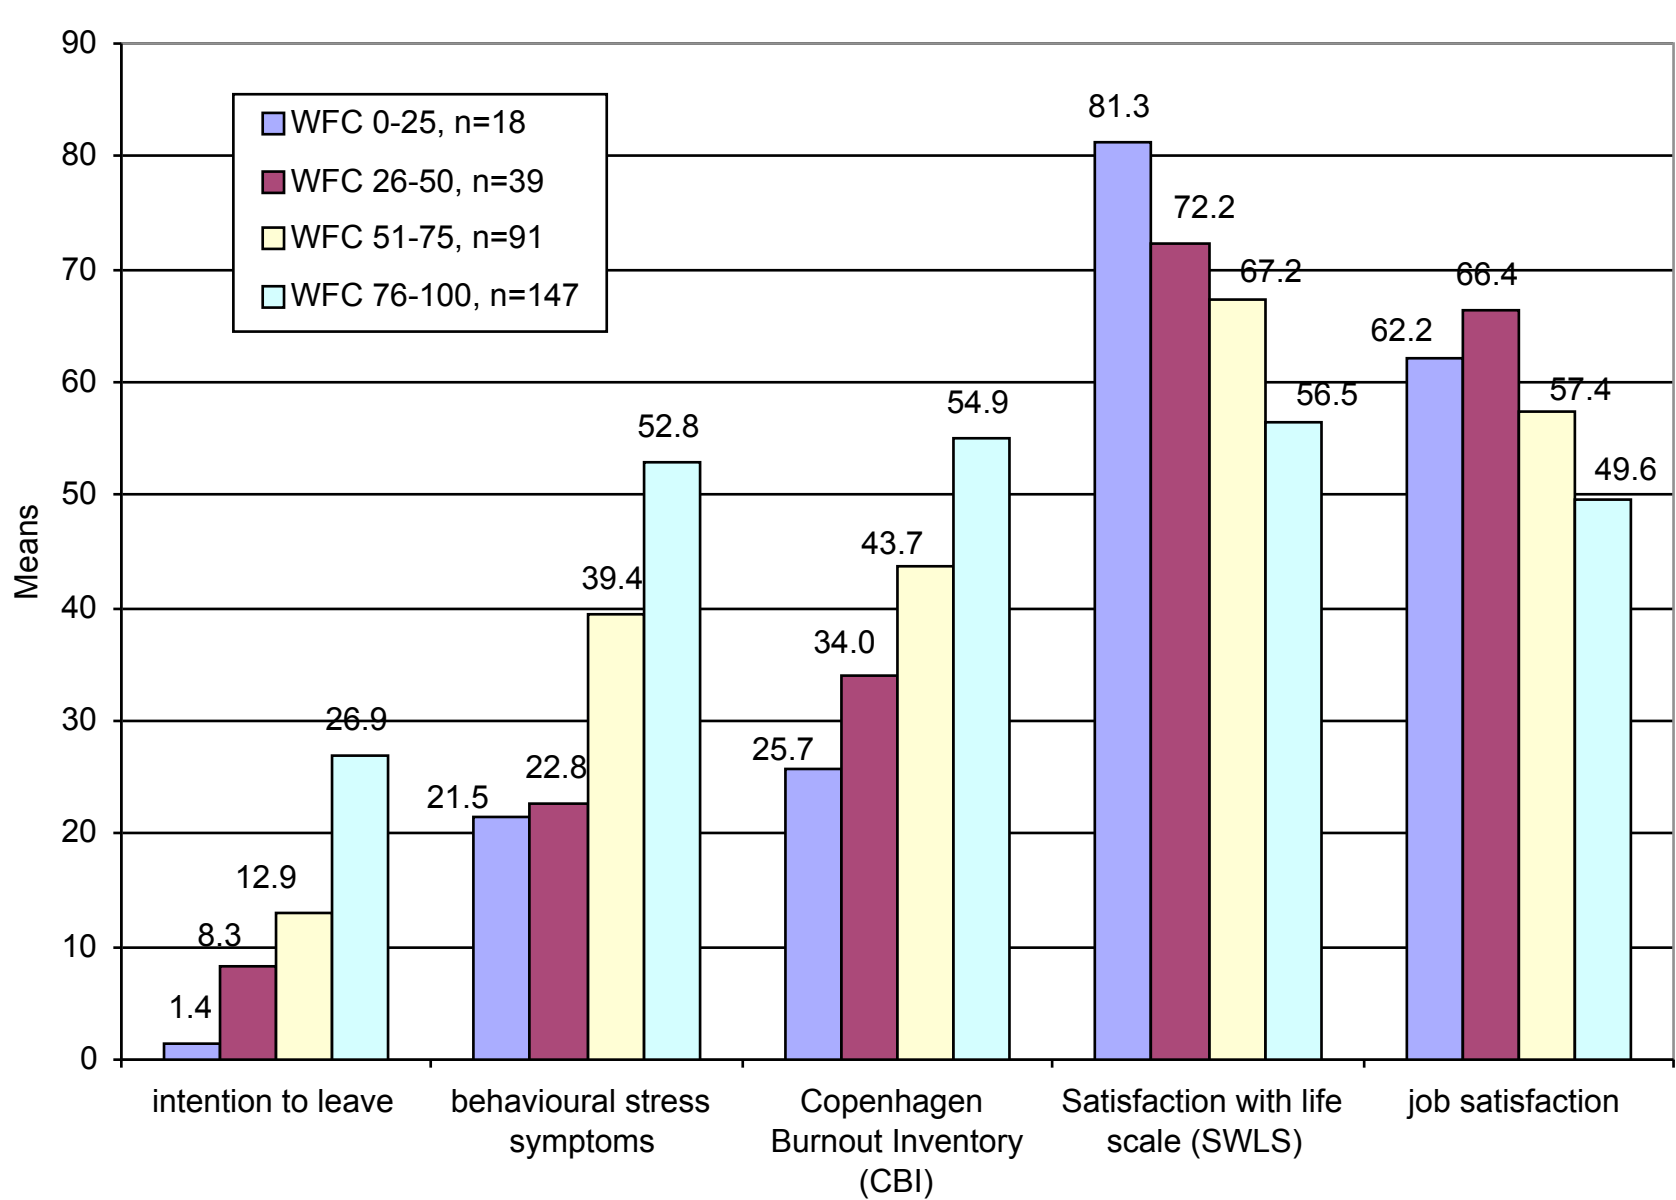

Supplement: MOESM5 [file 9502966]
